# Supplementary material for: Analytical Studies of Antimicrobial Peptides as Diagnostic Biomarkers for the Detection of Bacterial and Viral Pneumonia
Source: MDPI journal article supplement (doi:10.3390/bioengineering9070305), 2022-07-11
Supplement: s1 [file s1]

## Putative AMPs

### BOPAM-AB

1 FLPIVGKLLKSGLSGLL  
2 FFPIVGKLLKSGLSGLL  
3 FFPIVGKLLKFGLFGLL  
4 FFPIVGKLLKFGLSGLL  
5 AIKTVGKAVGKGLRAIN

### BOPAM-KP

1 VCKEEGRSSGHCSPSLKCWCEGC  
2 MWKYVVKGGLNNGVQCKIDNC  
3 MWKHVVKLGNFTVQCKIDNC  
4 IHHEAGKGGYIPYLKWHLRKK  
5 ICKEEGRISGHCSASLKCWFKKR  
6 LAKKAKKAGAEKKKCKELAKK  
7 LCREEGHVSGHCSASLKCWRAMK

### BOPAM-SP

1 QGRDDRYCESIMRRRGLTSPCKDINTFIHGNKRSIKAICENKNG  
2 KGRNDRYCESMMERRGLTTPCKDTNTFIHGNKGSIKAICGNKNG  
3 FRHDSGIGEYEVHHQKLVFFAEDVSGSNKGFCIIGLMVGGVVI  
4 FRHDSGIGEYEVHHQKLVFFAEDVSGSNKGFCIIGLMVGGIVI  
5 FRHESGIGEYEVHHQKLVFFAEDVSGSNKGFCIIGLMVGGVVI  
6 FRHDSGIGEYEVHHQKLVFFAEDVSGSNKGFCIIGLMVGGVVI  
7 YRHDAAGIEYEVHHQKLVFFAEEVSGSNKGFCIIGLMVGGVVI  
8 KGRDNKYCETMMEKRHLTKPCKSINTFVHGNKNNDIKDICKDKNG

### INFLUENZA A

1 TPTFIDGQVPIPKQ  
2 CPVILDSAIQVLPK  
3 TPTFIDGQVTVPDQ  
4 TPTFIDGQVPMPPQ  
5 TPTFIDGQVPIPPQ  
6 TPKFIDGQVPIPEQ  
7 CPVILDSSIQVFPK  
8 TPTFIDGQVPIPEQ

### INFLUENZA B

1 MDVSHRWTFRLRVPPQ  
2 MDVSHRWTFRLMVPPQ  
3 LNCNPQLLCLNCPQ  
4 LKILQLLLFLKVPQL  
5 LTILQLLLFLKVPQL  
6 LNCNPPLLCLNCPQ

### RESPIRATORY SYNCYTIAL VIRUS

1 IVSSIKEEINLCKNKF  
2 EVSKINEKIDSNLSTV  
3 NIVDVNKKIDANTTAI  
4 KVTEINANIDNNVNII  
5 AINSVSAQVNKNTNNI

|    |                  |
|----|------------------|
| 6  | KFSQICEAIDMQTSVI |
| 7  | NISNVKNELNQNINNV |
| 8  | SIYNFNENSNVLLSAV |
| 9  | NISKVTNQVNTNTTNI |
| 10 | VINDVSKQVNTNTTNI |
| 11 | NVTNISNKVDVNTADI |
| 12 | DITNINNNIDAKFTKI |
| 13 | KIRDLNEKLDDRITNV |
